# Supplementary material for: Epstein-Barr virus genetics: talking about the BAC generation
Source: Springer Nature journal article supplement (doi:10.1186/2042-4280-1-6), 2010-12-01
Supplement: 13276_2010_6_MOESM3_ESM.pdf [file 13276_2010_6_MOESM3_ESM.pdf]

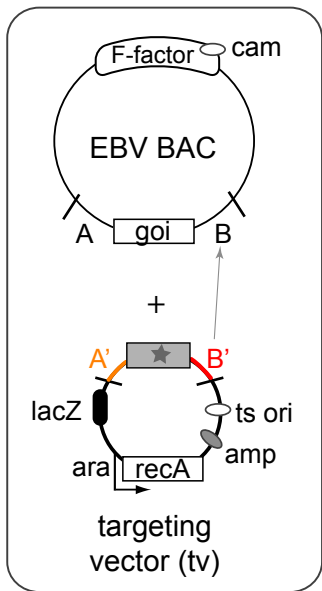

arabinose  
30°C  
cam/amp  
selection

recombination

3x  
42°C

loss of  
non-  
recombined  
tv

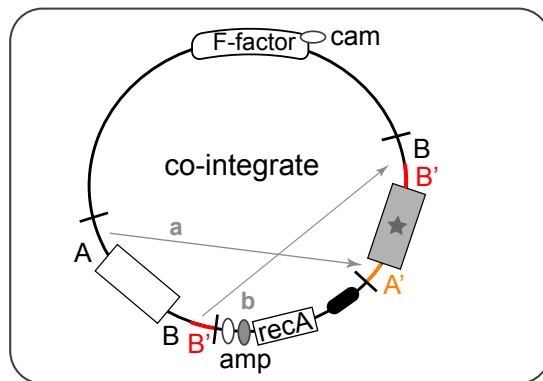

arabinose  
30°C

co-integrate  
resolution

a

b

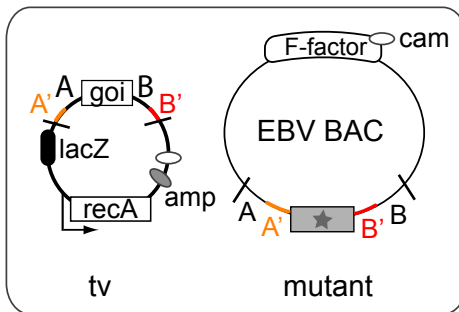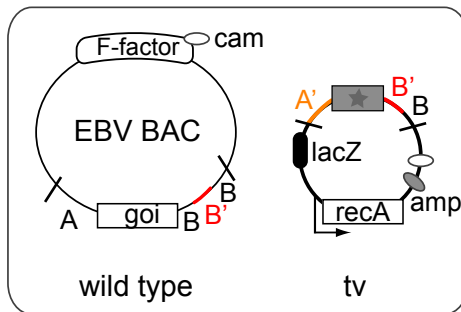

X-gal, cam  
42°C

loss of tv

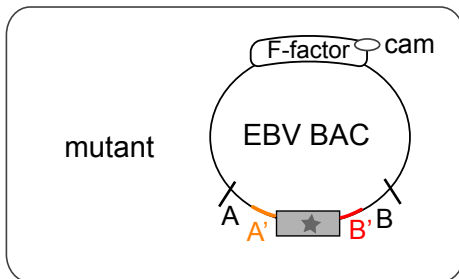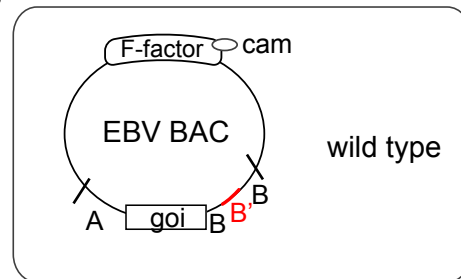

*select for X-gal-negative colonies and identify mutant clones by e.g. restriction enzyme analysis*
