# Supplementary material for: Epstein-Barr virus genetics: talking about the BAC generation
Source: Springer Nature journal article supplement (doi:10.1186/2042-4280-1-6), 2010-12-01

**A**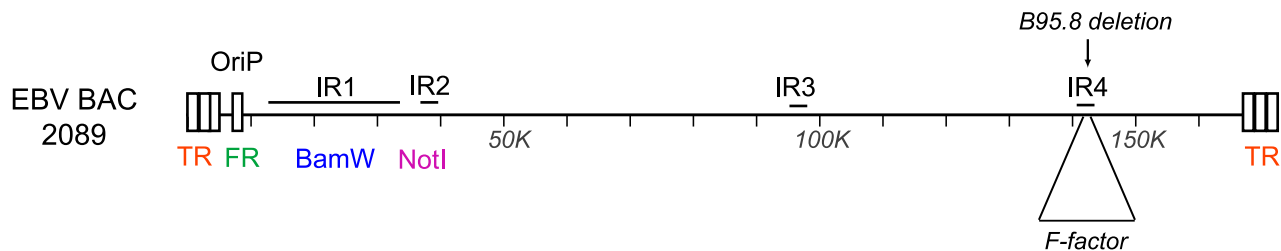**B**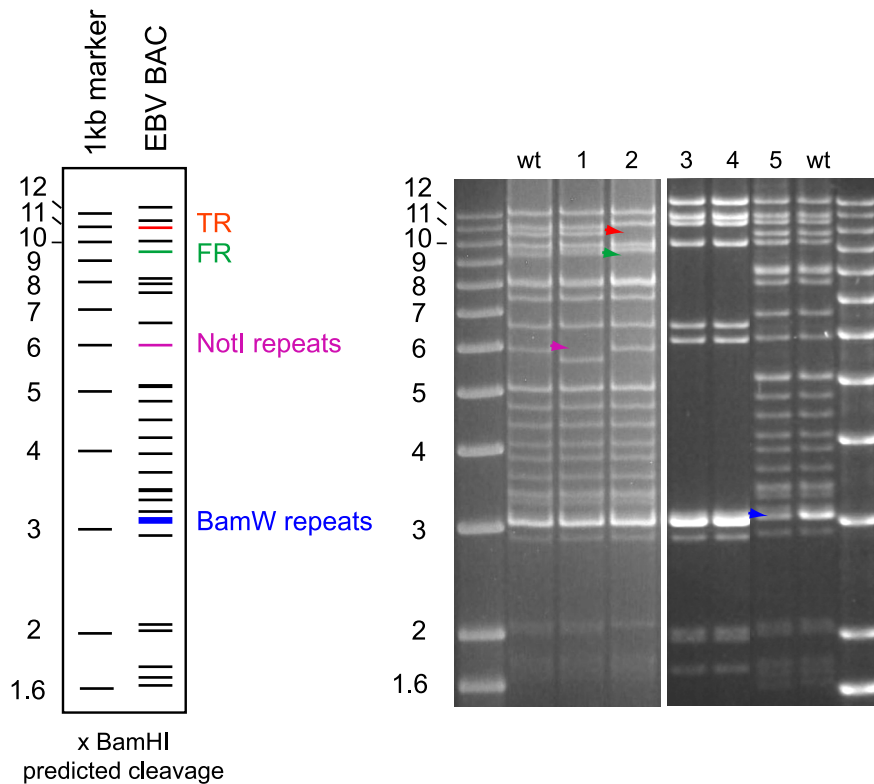

Supplement: 13276_2010_6_MOESM4_ESM.pdf [file 13276_2010_6_MOESM4_ESM.pdf]
